# Supplementary material for: Challenges and opportunities in catalytic hydrogenolysis of oxygenated plastics waste: polyesters, polycarbonates, and epoxy resins
Source: Royal Society of Chemistry journal article supplement (doi:10.1039/d4gc03784g), 2024-11-25
Supplement: d4gc03784g1.pdf [file d4gc03784g1.pdf]

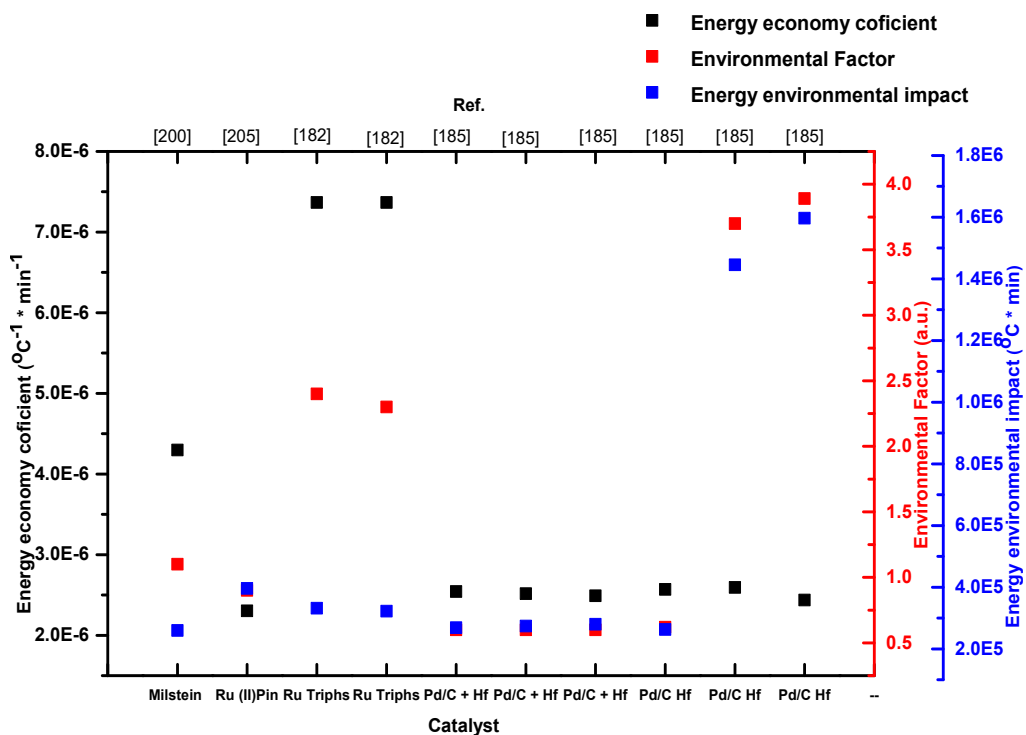

**Fig.S<sub>1</sub>** shows the energy economy factor ( $\epsilon$ ), environmental energy impact ( $\xi$ ), and environmental factor (E) values for hydrogenolysis of polyester (PET/PBT) with homogeneous catalysts. Data is sourced from Table 2.

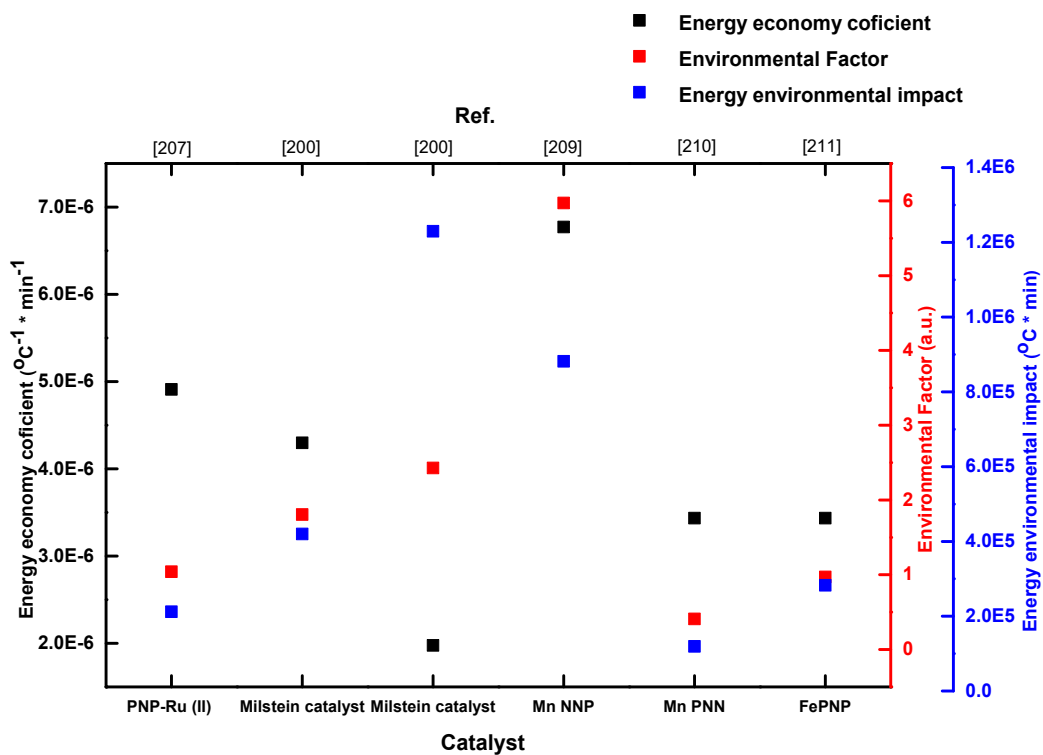

**Fig.S<sub>2</sub>** shows the energy economy factor ( $\epsilon$ ), environmental energy impact ( $\xi$ ), and environmental factor (E) values for hydrogenolysis of aliphatic polycarbonates (PPC) using homogeneous catalysts. Data is sourced from Table 3.

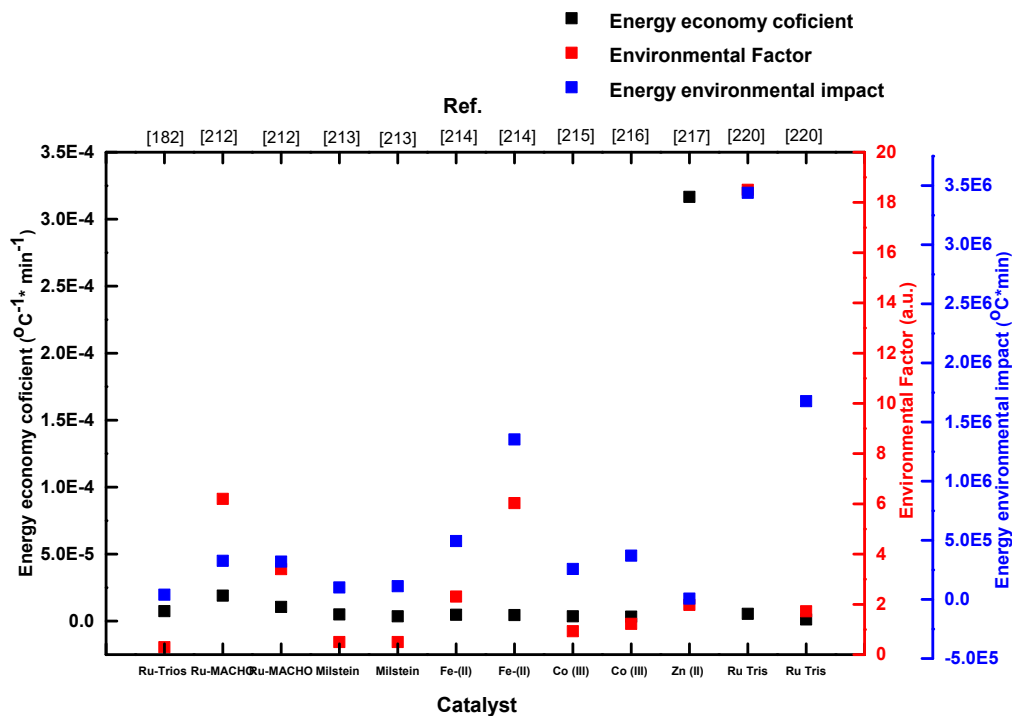

**Fig.S<sub>3</sub>** shows the energy economy factor ( $\varepsilon$ ), environmental energy impact ( $\xi$ ), and environmental factor (E) values for hydrogenolysis of aromatic polycarbonates (BPA-PC) using homogeneous catalysts. Data is sourced from Table 3.

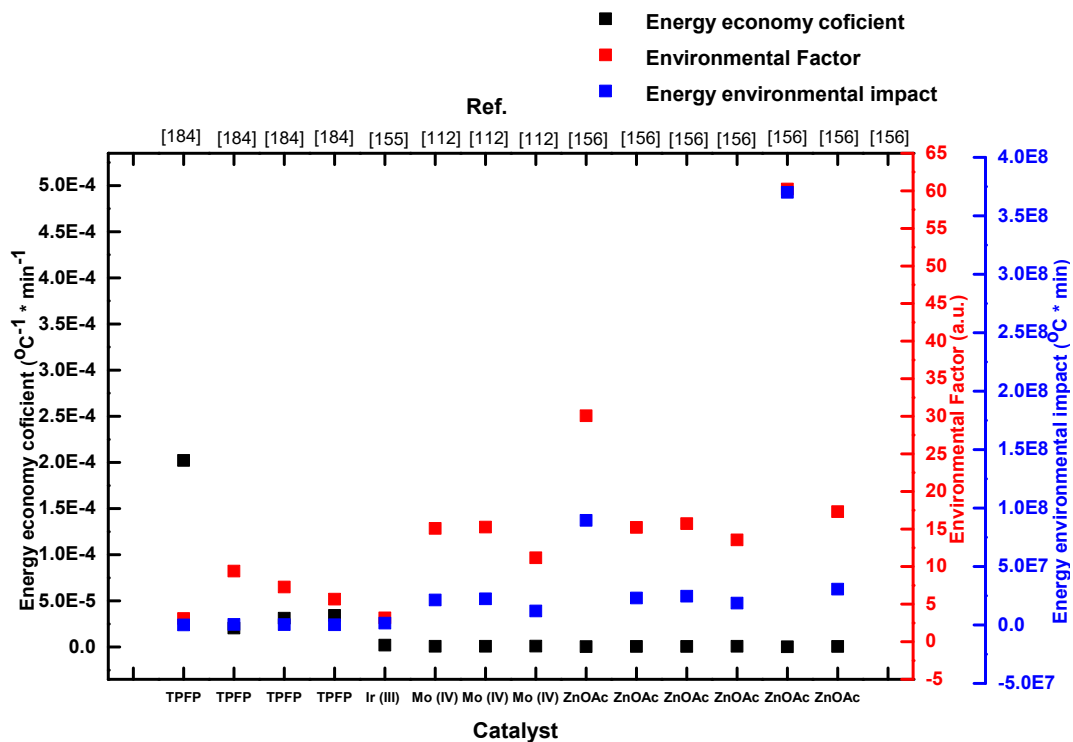

**Fig.S<sub>4</sub>** shows the energy economy factor ( $\varepsilon$ ), environmental energy impact ( $\xi$ ), and environmental factor (E) values for In-situ Hydrogenolysis of polyesters (PET/PBT) with homogeneous catalysts using Hydrosilylation as a reducing agent. Data is extracted from Table 4.

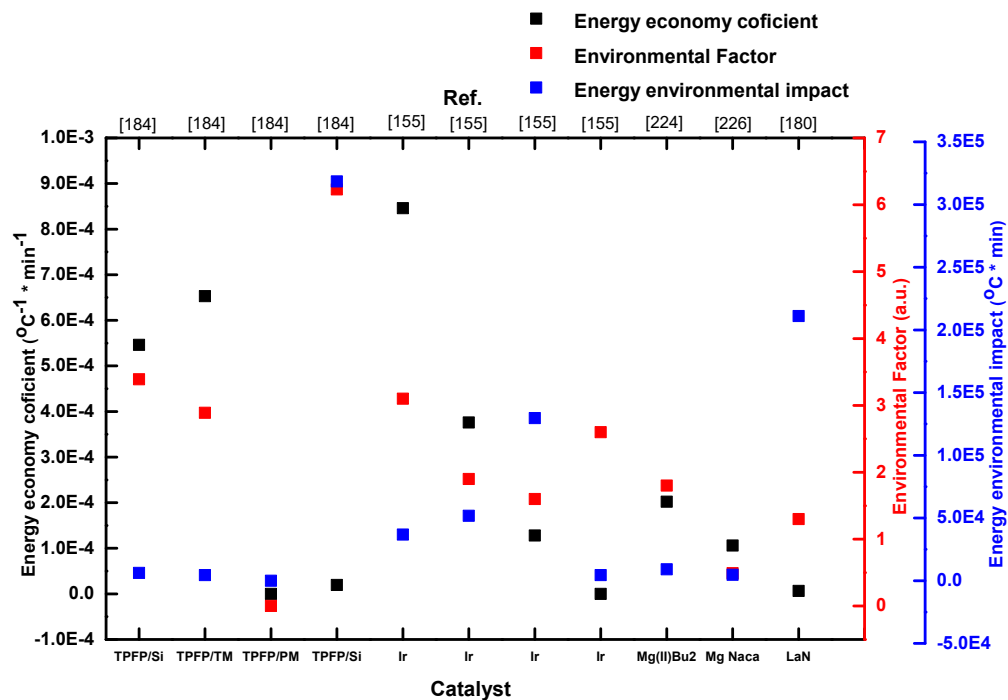

Fig.S<sub>5</sub> shows the energy economy factor ( $\epsilon$ ), environmental energy impact ( $\xi$ ), and environmental factor (E) values for In-situ Hydrogenolysis of polycarbonates (PPC/BPA-PC) with homogeneous catalysts using Hydrosilylation/boration as a reducing agent. Data is extracted from Table 5.

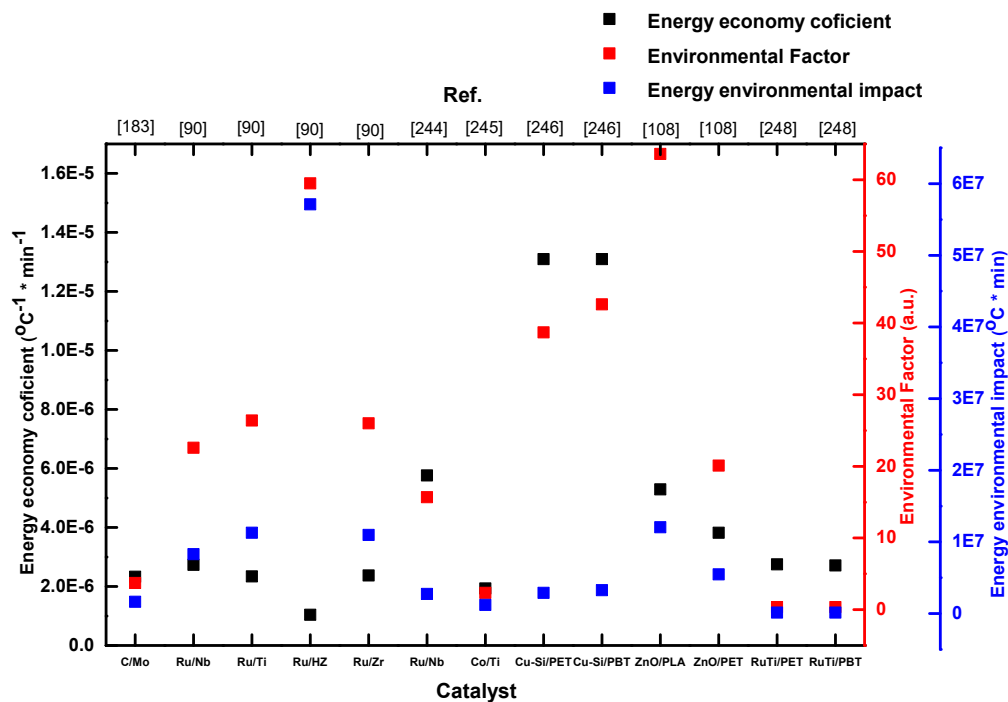

**Fig.S<sub>6</sub>** shows the energy economy factor ( $\varepsilon$ ), environmental energy impact ( $\xi$ ), and environmental factor (E) values for hydrogenolysis of polyesters (PET/PBT) using heterogeneous catalysts. Data is sourced from Table 6.

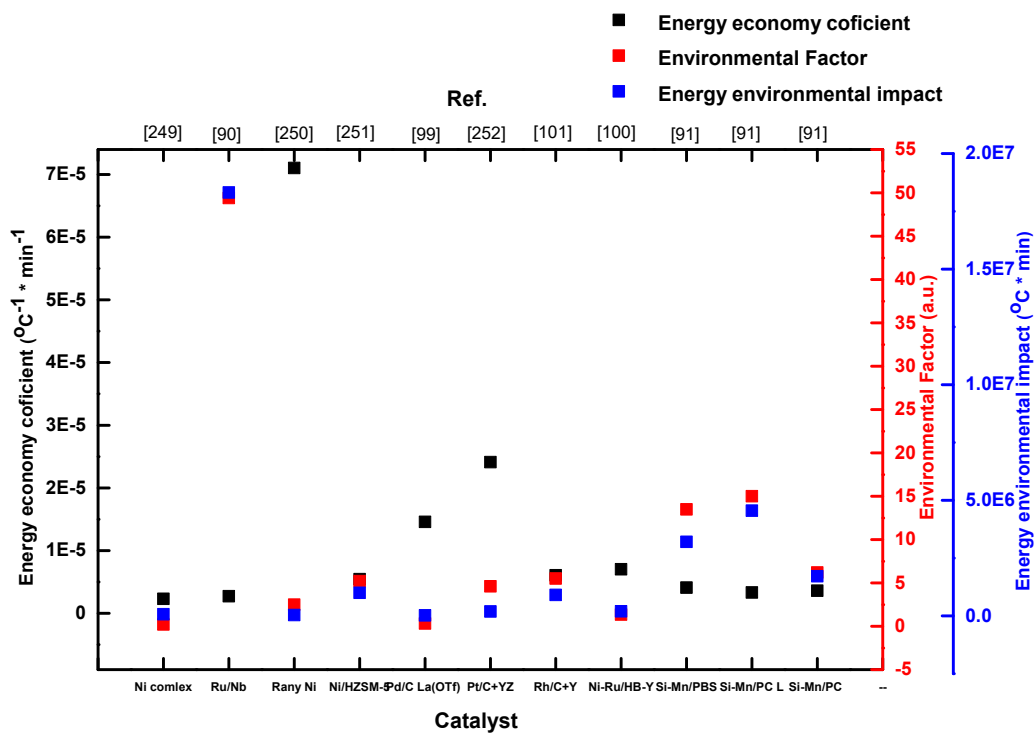

**Fig.S7** shows the energy economy factor ( $\epsilon$ ), environmental energy impact ( $\xi$ ), and environmental factor ( $E$ ) values for hydrogenolysis of BPA-PC using heterogeneous catalysts. Data is sourced from Table 6.
